# Supplementary material for: Clinical and Nutritional Impact of a Semi-Elemental Hydrolyzed Whey Protein Diet in Patients with Active Crohn’s Disease: A Prospective Observational Study
Source: MDPI journal article supplement (doi:10.3390/nu13103623), 2021-10-16
Supplement: s1 [file s1]

## SUPPLEMENTARY TABLES

**Supplementary Table S1.** Nutritional information of the semi-elemental whey-hydrolyzed protein diet without fiber.

| Average content             |           | Bottle (200 ml) |
|-----------------------------|-----------|-----------------|
| Energy value                | kJ (kcal) | 840 (200)       |
| <b>Fat</b>                  | g         | 5.6             |
| Saturated fatty acids       | g         | 2.9             |
| Medium chain triglycerides  | g         | 2.7             |
| Monounsaturated fatty acids | g         | 1.6             |
| Polyunsaturated fatty acids | g         | 1.1             |
| <b>Carbohydrate</b>         | g         | 28.2            |
| Sugars                      | g         | 10.0            |
| Lactose                     | g         | ≤0.2            |
| <b>Protein</b>              | g         | 9.3             |
| <b>Fibre</b>                | g         | <0.2            |

**Supplementary Table S2.** Bivariate analysis of potential factors associated with nutritional status improvement.

|                                                           |              |              |              | p      |
|-----------------------------------------------------------|--------------|--------------|--------------|--------|
| Diagnosis                                                 | Recent       | Previous     |              | 0.447  |
| Maintenance low-risk malnourishment                       | 5 (9.8%)     | 7 (7.7%)     |              |        |
| Maintenance moderate malnourishment                       | 2 (3.9%)     | 4 (4.4%)     |              |        |
| Maintenance severe malnourishment                         | 2 (3.9%)     | 3 (3.3%)     |              |        |
| 1-level improvement (severe to moderate)                  | 5 (9.8%)     | 18 (19.8%)   |              |        |
| 2-level improvement (severe to low-risk malnourishment)   | 16 (31.4%)   | 15 (16.5%)   |              |        |
| 1-level improvement (moderate to low-risk malnourishment) | 21 (41.2%)   | 44 (48.4%)   |              |        |
| Surgery                                                   | Yes          | No           |              | 0.998  |
| Maintenance low-risk malnourishment                       | 2 (4.3%)     | 10 (10.6%)   |              |        |
| Maintenance moderate malnourishment                       | 0 (0.0%)     | 6 (6.4%)     |              |        |
| Maintenance severe malnourishment                         | 2 (4.3%)     | 3 (3.2%)     |              |        |
| 1-level improvement (severe to moderate)                  | 11 (23.4%)   | 11 (11.7%)   |              |        |
| 2-level improvement (severe to low-risk malnourishment)   | 11 (23.4%)   | 20 (21.3%)   |              |        |
| 1-level improvement (moderate to low-risk malnourishment) | 21 (44.7%)   | 44 (46.8%)   |              |        |
| Number of supplements                                     | 1 bottle/day | 2 bottle/day | 3 bottle/day | <0.001 |
| Maintenance low-risk malnourishment                       | 5 (100%)     | 7 (9.6%)     | 0 (0.0%)     |        |
| Maintenance moderate malnourishment                       | 0 (0.0%)     | 5 (6.8%)     | 1 (1.6%)     |        |
| Maintenance severe malnourishment                         | 0 (0.0%)     | 0 (0.0%)     | 5 (7.8%)     |        |
| 1-level improvement (severe to moderate)                  | 0 (0.0%)     | 0 (0.0%)     | 23 (35.9%)   |        |
| 2-level improvement (severe to low-risk malnourishment)   | 0 (0.0%)     | 0 (0.0%)     | 31 (48.4%)   |        |
| 1-level improvement (moderate to low-risk malnourishment) | 0 (0.0%)     | 61 (83.6%)   | 4 (6.3%)     |        |
| Weight                                                    | Loss         | Gain         |              | <0.001 |
| Maintenance low-risk malnourishment                       | 5 (25.0%)    | 7 (5.9%)     |              |        |
| Maintenance moderate malnourishment                       | 3 (15.0%)    | 3 (2.5%)     |              |        |

|                                                           |           |            |
|-----------------------------------------------------------|-----------|------------|
| Maintenance severe malnourishment                         | 5 (25.0%) | 0 (0.0%)   |
| 1-level improvement (severe to moderate)                  | 3 (15.0%) | 20 (16.8%) |
| 2-level improvement (severe to low-risk malnourishment)   | 1 (5.0%)  | 30 (25.2%) |
| 1-level improvement (moderate to low-risk malnourishment) | 3 (15.0%) | 59 (49.6%) |

P-values were calculated with the Chi-square test.

**Supplementary Table S3.** Bivariate analysis of potential factors associated with albumin levels improvement.

|                                 |                            |                            |                          | p           |
|---------------------------------|----------------------------|----------------------------|--------------------------|-------------|
| Nutritional status              | Low-risk<br>malnourishment | Moderate<br>malnourishment | Severe<br>malnourishment | <0.001      |
| Change in albumin levels        | 0.52                       | 0.50                       | 0.93                     |             |
| Number of supplements           | 1 bottle/day               | 2 bottle/day               | 3 bottle/day             | <0.001      |
| Change in albumin levels        | 0.06                       | 0.54                       | 0.89                     |             |
| Gastrointestinal symptomatology | Good                       | Moderate                   | Severe                   | 0.073       |
| Change in albumin levels        | 0.74                       | 0.49                       | 0.5                      |             |
| Disease severity                | Remission                  | Mild                       | Moderate                 | 0.877       |
| Change in albumin levels        | 0.69                       | 0.71                       | 0.63                     |             |
| Adherence                       | Whole content              | 2/3 content                | 1/2 content              | 1/4 content |
| Change in albumin levels        | 0.73                       | 0.6                        | 0.14                     | 0.2         |

P-values were calculated with the ANOVA test.

**Supplementary Table S4.** Bivariate analysis of potential factors associated with body mass index improvement.

|                                 |                                |                                |                              |             | p     |
|---------------------------------|--------------------------------|--------------------------------|------------------------------|-------------|-------|
| Nutritional status              | Low-risk<br>malnourishmen<br>t | Moderate<br>malnourishmen<br>t | Severe<br>malnourishmen<br>t |             |       |
| BMI change                      | 1.14                           | 0.99                           | -0.48                        |             |       |
| Number of supplements           | 1 bottle/day                   | 2 bottle/day                   | 3 bottle/day                 | 0.275       |       |
| BMI change                      | 0.55                           | 0.83                           | 1.04                         |             |       |
| Gastrointestinal symptomatology | Good                           | Moderate                       | Severe                       | 0.294       |       |
| BMI change                      | 1.04                           | 1.33                           | 0.49                         |             |       |
| Disease severity                | Remission                      | Mild                           | Moderate                     | 0.005       |       |
| BMI change                      | 0.87                           | 1.51                           | 0.47                         |             |       |
| Adherence                       | Whole<br>content               | 2/3 content                    | 1/2 content                  | 1/4 content | 0.368 |
| BMI change                      | 0.99                           | 1.56                           | 0.66                         | 0.35        |       |

BMI, body mass index. P-values were calculated with the ANOVA test.

**Supplementary Table S5.** Bivariate analysis of potential factors associated with HBI improvement.

|                    |               |                 |               | p      |
|--------------------|---------------|-----------------|---------------|--------|
| Nutritional status | Low-risk      | Moderate        | Severe        |        |
|                    | malnourishmen | malnourishmen   | malnourishmen |        |
|                    | t             | t               | t             |        |
| HBI change         | -38.33        | -48.87          | -81.17        | <0.001 |
| <b>Diagnosis</b>   | <b>Recent</b> | <b>Previous</b> |               | 0.025  |
| HBI worsening      | 9.6%          | 1.1%            |               |        |
| HBI improvement    | 90.4%         | 98.9%           |               |        |

P-values were calculated with the ANOVA test for HBI change or the Chi-square test for diagnosis.

**Supplementary Table S6.** Bivariate analysis of potential factors associated with stool frequency improvement.

|                                 |               |               |               |             | p     |
|---------------------------------|---------------|---------------|---------------|-------------|-------|
| Nutritional status              | Low-risk      | Moderate      | Severe        |             |       |
|                                 | malnourishmen | malnourishmen | malnourishmen |             |       |
|                                 | t             | t             | t             |             |       |
| Stool frequency change          | -2.53         | -3.72         | -2            | 0.135       |       |
| Number of supplements           | 1 bottle/day  | 2 bottle/day  | 3 bottle/day  |             |       |
| Stool frequency change          | -1.40         | -2.35         | -3.42         | 0.072       |       |
| Gastrointestinal symptomatology | Good          | Moderate      | Severe        | 0.012       |       |
| Stool frequency change          | -2.82         | -2.78         | 1.75          |             |       |
| Disease severity                | Remission     | Mild          | Moderate      | 0.012       |       |
| Stool frequency change          | -3.26         | -1.82         | -1.33         |             |       |
| Adherence                       | Whole content | 2/3 content   | 1/2 content   | 1/4 content | 0.399 |
| Stool frequency change          | -2.79         | -2.40         | -4.20         | 0.0         |       |

P-values were calculated with the ANOVA test
